# Supplementary material for: Arabidopsis thaliana G3BP Ortholog Rescues Mammalian Stress Granule Phenotype across Kingdoms
Source: MDPI journal article supplement (doi:10.3390/ijms22126287), 2021-06-11
Supplement: s1 [file s1]

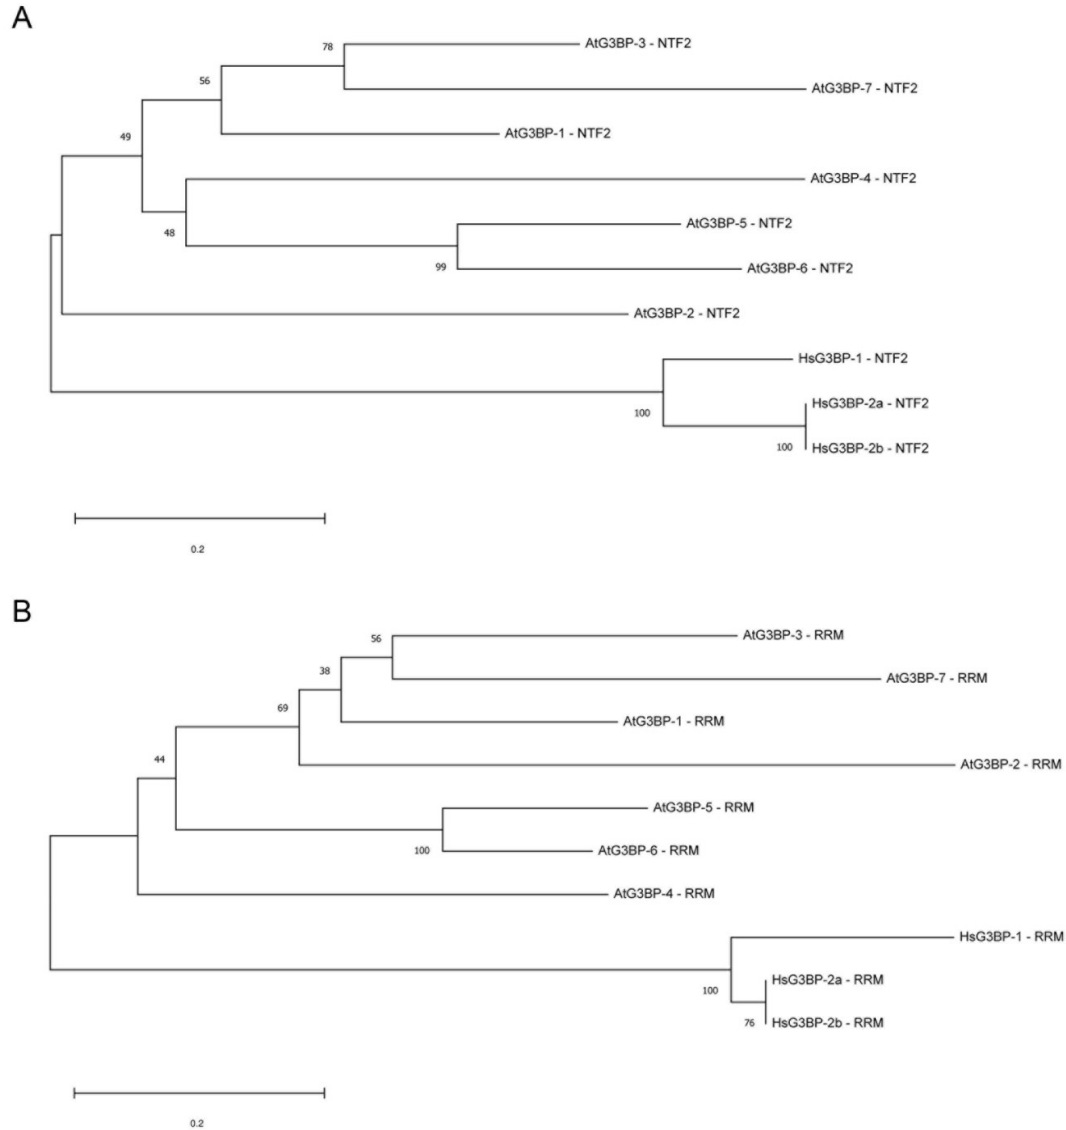

**Supplementary Figure S2** Phylogenetic analysis of the full-length protein as well as the different domains of the human and Arabidopsis G3BP family.

The optimal tree with the sum of branch length of (A) 3.33018155 for the NTF2-like domain and (B) 3.31032469 for the RRM is shown. Evolutionary analyses were carried out as described in the methods section.

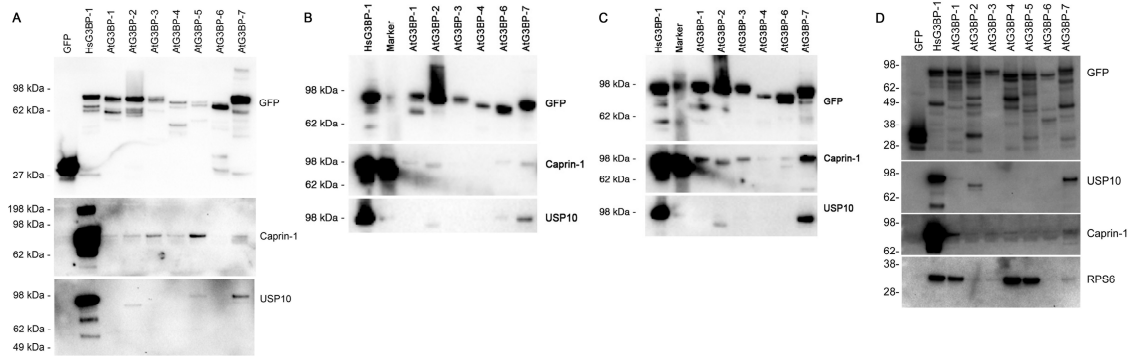

**Supplementary Figure S3** Co-immunoprecipitation of human interaction partners in stable transformed (A-C) and transiently expressing (D) cell lines.

Anti-GFP co-immunoprecipitation for HsG3BP1/2<sup>-/-</sup> U2OS cells transfected with the different EGFP-G3BPs or free GFP. The western blot analysis of the indicated interaction partners has been carried out in four independent experiments. Please note that (B) and (C) lack the analysis for free GFP and AtG3BP-5 as these stable cell lines have not been generated at that point.

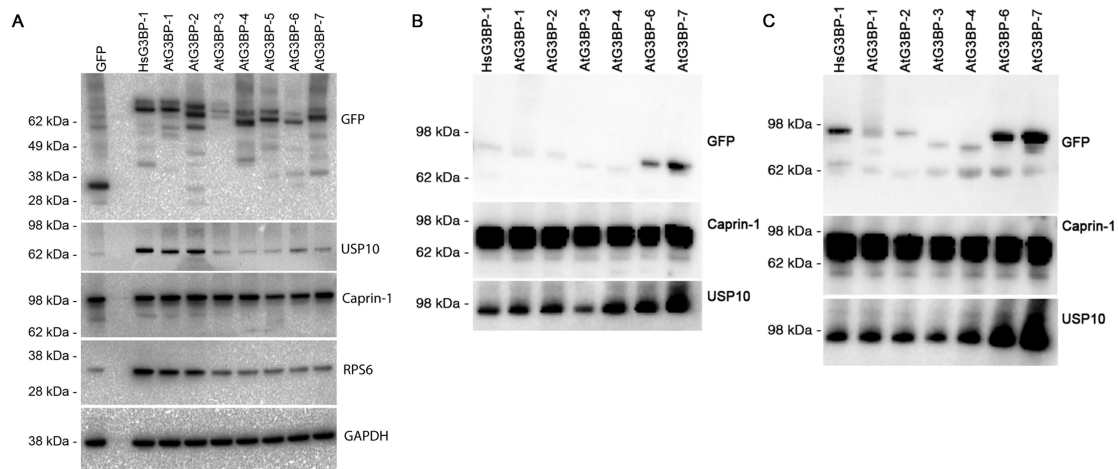

**Supplementary Figure S4** Cell lysates referring to the co-immunoprecipitation of human interaction partners in cell lines expressing the indicated construct.

(A) Cell lysates referring to Figure S3D, (B) to Figure S3B, and (C) to Figure S3C. Please note that (B) and (C) lack the analysis for free GFP and AtG3BP-5 as these stable cell lines have not been generated at that point.
